1

Submission type: **Research article**

2

**Recombinant haplotypes reflect sexual reproduction in symbiotic arbuscular**

3

**mycorrhizal fungi**

4

Ivan D. Mateus<sup>1\*</sup>, Ben Auxier<sup>2</sup>, Mam M. S. Ndiaye<sup>1</sup>, Joaquim Cruz<sup>1</sup>, Soon-Jae Lee<sup>1</sup> & Ian R.

5

Sanders<sup>1</sup>

6

<sup>1</sup>*Department of Ecology and Evolution, University of Lausanne, Biophore building, 1015*

7

*Lausanne, Switzerland*

8

<sup>2</sup>*Laboratory of Genetics, Wageningen University, Wageningen, the Netherlands.*

9

\* Author for correspondence: [ivandario.mateusgonzalez@unil.ch](mailto:ivandario.mateusgonzalez@unil.ch)

10

11

**Keywords:** Arbuscular mycorrhizal fungi, AMF, haplotypes, recombination, sexual

12

reproduction

13

14

15

16

17

18

19

20

21

22 **Abstract**

23 Arbuscular mycorrhizal fungi (AMF) are part of the most widespread fungal-plant symbiosis.  
24 They colonize at least 80% of plant species, promote plant growth and plant diversity. These  
25 fungi are multinucleated and display either one or two nucleus genotypes (monokaryon and  
26 dikaryon) determined by a putative mating-type locus. This taxon has been considered as an  
27 ancient asexual scandal because of the lack of observable sexual structures. Despite the  
28 identification of a putative mating-type (MAT-type) locus and the functional activation of  
29 genes related to mating when two isolates co-exist, it is still unknown if AMF display a sexual  
30 or a parasexual life cycle.

31 To test if AMF genomes display signatures of a sexual life-cycle involving the putative MAT-  
32 locus, we used publicly available genome sequences to test if recombining nucleotide-  
33 specific haplotypes could be identified using short-read Illumina sequences. We identified  
34 nucleus genotype-specific haplotypes within dikaryons and compared them to orthologous  
35 gene sequences from related monokaryon isolates displaying similar putative MAT-types.  
36 We show that haplotypes within a dikaryon isolate are more similar to homologue sequences  
37 of isolates having the same MAT-type than among them. We demonstrate that these  
38 genotype-specific haplotypes are recombinant, and are not consistently most similar to the  
39 monokaryon isolate sharing the same mating-type allele.

40 These results are consistent with a sexual origin of the dikaryon rather than a parasexual  
41 origin and provides an important step to understand the life cycle of these globally important  
42 symbiotic fungi.

43

#### 44 **Introduction**

45 Arbuscular mycorrhizal fungi are plant symbionts, forming symbioses with most plant  
46 species, promoting plant growth (Harrison, 1997), plant community diversity (van der Heijden  
47 *et al.*, 1998; Antunes *et al.*, 2011) and how plants cope with biotic (Thygesen *et al.*, 2004) or  
48 abiotic stresses (Augé, 2001). As a consequence, they are widely used in agriculture (Smith  
49 & Read, 2008). Within isolate genetic variability in AMF has been reported to result in  
50 differential effects on plant growth (Angelard *et al.*, 2010). Understanding how genetic  
51 variability is generated in AMF, is important because it could be harnessed to generate  
52 genetic variants that could be beneficial for their plant hosts (Sanders, 2010).

53 AMF are part of the Glomeromycotina subphylum (Spatafora *et al.*, 2016), which fossil  
54 records date to at least ~400 Million years ago (Remy *et al.*, 1994). They are coenocytic  
55 (without septa separating otherwise adjacent compartments), their hyphae harbor hundreds  
56 of nuclei within the same cytoplasm (Marleau *et al.*, 2011) and no single-nucleus state has  
57 ever been recorded in these taxa. The nuclei of these fungi have been reported as haploid  
58 (Ropars *et al.*, 2016; Kobayashi *et al.*, 2018; Morin *et al.*, 2019b). This group of fungi has  
59 been previously considered as an ancient asexual scandal (Judson & Normark, 1996),  
60 because of low morphological diversification and the absence of observable sexual  
61 structures leading to the conclusion that they only reproduce asexually. However, evidence  
62 suggests that sexual reproduction could be possible in AMF because these fungi contain a  
63 complete meiosis machinery (Halary *et al.*, 2011). Furthermore, a putative MAT-locus has  
64 been proposed (Ropars *et al.*, 2016), population genetic data suggests the existence of  
65 recombination in AMF populations (Croll & Sanders, 2009) and activation of genes related to  
66 mating has been detected when different isolates of the same species co-exist in plant roots  
67 (Mateus *et al.*, 2020). Inter-nucleus recombination has been reported (Chen *et al.*, 2018a),  
68 although the robustness of the analysis has been questioned. The application of strict  
69 filtering parameters such as removal of heterozygous sites in haploid nuclei, duplicated  
70 regions of the genome, and low-coverage depths base calls results in an extreme loss of

71 recombination signal (Auxier & Bazzicalupo, 2019), calling the conclusions of the study into  
72 question. Although some of these limitations, as coverage depth and filtering-out  
73 heterozygous sites were addressed (Chen *et al.*, 2020), other limitations such as replicability  
74 (recombination events shown in several nuclei sharing the same putative MAT-type) and  
75 issues related to the whole-genome amplification step as the formation of chimeric  
76 sequences (Yilmaz & Singh, 2012), allelic drop-out (Lauri *et al.*, 2013) and SNP miscalling  
77 (Ning *et al.*, 2014) are inherent limitations of the analysis of single nucleus amplification data.

78 Like most fungi, AMF can undergo anastomosis, the fusion of hyphae. Through these  
79 connections, bi-directional flow of cytoplasm has been observed between genetically  
80 different AMF individuals (Giovannetti *et al.*, 1999). Via anastomosis, the transfer of genetic  
81 material (parasexuality) has been suggested, as well, as a mechanism of maintenance of  
82 genetic diversity in the absence of sexual recombination (Bever & Morton, 1999). However,  
83 the existence and relevance of sexuality and/or parasexuality for the evolution of AMF  
84 remains unknown (Yildirim *et al.*, 2020). It is still unknown whether a sexual event comprising  
85 meiotic recombination, or a parasexual event, could influence the transition between  
86 dikaryon and monokaryon isolates.

87 In the past, there was a debate about nuclei being identical (homokaryosis) or different  
88 (heterokaryosis). Today, it is widely accepted that the model AMF species *Rhizophagus*  
89 *irregularis* exists either as monokaryons (such as isolates DAOM197198, A1,B12,C2) or  
90 dikaryons (such as isolates A4, A5, SL1, C3 and G1) (Ropars *et al.*, 2016; Chen *et al.*,  
91 2018a; Masclaux *et al.*, 2018; Kokkoris *et al.*, 2021). Single-nuclei from dikaryons (isolates  
92 A4, A5 and SL1) cluster into two genetically different nucleotypes (where nucleotype refers  
93 to the genotype of a nucleus), based on the identity of their mating type locus (MAT-locus)  
94 (Chen *et al.*, 2018a). This demonstrates that the presence of two copies of the MAT-locus is  
95 a reliable marker of the dikaryon state. However, the claimed evidence of large inter-nuclei  
96 recombination (Chen *et al.*, 2018a, 2020) does not fit the observations about a monokaryon  
97 – dikaryons organization. The presence of repeated inter-nuclear recombination in dikaryons

98 without prior crossing with other isolates, as observed in the single-nucleus genotypes  
99 shown in Chen et al. (2018, 2020) would result in heterokaryons with more than two types of  
100 nuclei. But this does not appear to be the case for *R. irregularis* (Ropars et al., 2016; Chen  
101 et al., 2018a; Masclaux et al., 2019; Auxier & Bazzicalupo, 2019).

102 In *R. irregularis*, a putative life cycle comprising the formation of dikaryons from  
103 monokaryons containing compatible alleles at the MAT-locus has been proposed (Ropars et  
104 al., 2016). A previous attempt to identify the origin of the dikaryon isolate A5 was made  
105 based on the hypothesis that the monokaryon isolates A1 (MAT-type 3) and C2 (MAT-type  
106 6) were the parents of the dikaryon isolate A5 (MAT-type 3/ MAT-type 6). Ropars et al., used  
107 single-nucleus data and observed that several positions in the genome did not support their  
108 hypothesis and concluded that these two isolates could not be the direct progenitors of  
109 isolate A5 (Ropars et al., 2016). However, this analysis was limited by the analysis of only 10  
110 single nucleus polymorphisms across 4 contigs, and included positions with more than one  
111 allele in a haploid single-nucleus, and that also show different alleles at a given position  
112 among single nuclei of monokaryon isolates. Consequently, we still do not know the origin of  
113 dikaryon isolates, whether they originate from the fusion of two monokaryon isolates, as in  
114 Basidiomycete fungi, and whether recombinant nucleotypes are detected in dikaryon  
115 isolates. To move beyond single polymorphisms, haplotype analysis would allow to exclude  
116 some of the limitations of previous methods. The haplotypes from dikaryon isolates can then  
117 be compared to orthologous sequences of related monokaryon isolates and would allow the  
118 identification of a sexual event, involving recombination, or a parasexual event in the  
119 absence of recombination that could explain the transition between AMF monokaryon and  
120 dikaryons.

121 The recent development of methods for long-read sequencing can be used to identify  
122 haplotypes and, consequently, nucleotide-specific haplotypes in fungal dikaryon isolates (Li  
123 et al., 2019). An alternative exists from the reanalysis of short-read sequences to identify  
124 genome wide copy number variation. These analyses consist in obtaining the read depth, or

125 coverage, after mapping the reads to a genome assembly and identifying changes in  
126 coverage across the genome (Yoon *et al.*, 2009). The analysis of drop in coverage has  
127 resulted in the identification of chromosome copy number variation and segmental  
128 chromosome aneuploidies in several fungal species (Todd *et al.*, 2017). In AMF, a drop in  
129 coverage analysis was used to originally identify the putative MAT-locus (Ropars *et al.*,  
130 2016) highlighting the potential to identify nucleotide-specific haplotypes in dikaryons with  
131 this technique.

132 Here, we demonstrated that AMF dikaryons display genetic recombination by analyzing  
133 nucleotide-specific haplotypes in dikaryon and monokaryon isolates. In this study we used  
134 publicly available whole genome and single-nucleus sequence data to identify nucleotide-  
135 specific haplotypes in dikaryon isolates. We identified regions displaying drops in coverage  
136 in whole genome sequence assemblies. In these regions we detected the presence of genes  
137 that have two copies in the dikaryon isolates and one copy in monokaryons. We then  
138 confirmed independently, with genome sequence data from single-nucleus, that in dikaryon  
139 isolates, different nuclei have different alleles of the previously detected genes, showing that  
140 the genes identified in this study are highly divergent alleles and are nucleotide-specific.  
141 The identification of nucleotide-specific alleles allowed us to test whether monokaryon  
142 isolates that share the same MAT-type could be the origin of dikaryon isolates and whether  
143 recombination could be detected between the nucleotide-specific haplotypes.

144

145

146 **Materials and Methods**

147

148 **Source data**

149 We used public-available sequence reads, genome assemblies and annotations of isolates  
150 A1, A4, A5, C2 of *R. irregularis* for this study, including data from whole-genome and single-  
151 nucleus sequencing (Supplementary Table 1). We downloaded the sequence reads from the  
152 sequence read archive (SRA) using the SRAToolkit software (Leinonen *et al.*, 2011). We  
153 used for the different analysis sequence reads from whole-genome and single-nucleus  
154 sequence data.

155

156 **Coverage analysis**

157 We first trimmed the sequence reads using Trimgalore (Krueger, 2015) with the default  
158 parameters. We then used BWA (Li, 2013) to index the reference genome assemblies and  
159 BWA mem -M (Li, 2013) to map the reads to the reference whole-genome assemblies. We  
160 mapped the reads coming from a given isolate to the reference genome assembly of the  
161 same isolate (i.e. reads A1 mapped to reference A1). We then kept the reads that display a  
162 mapping quality of at least 30. We used the genomecov tool from bedtools (Quinlan & Hall,  
163 2010) to calculate the coverage for each position. We then created a ready-to-use algorithm  
164 that detects genome-wide drop in coverage analysis in whole-genome data (Supplementary  
165 File 1). The algorithm divides the data in portions of 50000bp. Then, with a sliding window  
166 approach consisting of windows of 400bp and steps of 100bp, the algorithm searches for  
167 drops in coverage of 0.3-0.6 times lower than the median coverage of the entire genome  
168 and that display a minimum length of 1000bp (Please refer to Supplementary File 1 for the  
169 algorithm specifications). We then further filtered the drop in coverage regions by keeping

170 only the regions that display an average of 1.25 coverage difference between the  
171 neighboring regions and the drop in coverage region.

172

### 173 **Gene detection in drops**

174 We identified all the genes located within genomic regions that presented a drop of  
175 sequencing coverage. We used the 'intersect' command from the BEDTools suite with the  
176 existing gene annotations corresponding to each *R. irregularis* isolate (GTF format) and their  
177 query regions with drops in coverage (BED format) to find the overlapping genes (Quinlan &  
178 Hall, 2010). Genes in scaffolds smaller than 1kb were not considered for further analyses.

179

### 180 ***de novo* single-nucleus assemblies**

181 We trimmed the raw reads by using TrimGalore-0.6.0 (Krueger, 2015) with default  
182 parameters. After trimming, we performed single-nucleus *de novo* assemblies with SPAdes  
183 v3.14 (Bankevich *et al.*, 2012) with the following parameters: -k 21,33,55,77 --sc --careful --  
184 cov-cutoff auto. The resulted single-nucleus genome assemblies were used for further  
185 analysis. The length, number of contigs and N50 value of the *de novo* assemblies was  
186 evaluated with quast- 5.1.0rc1 with default parameters (Mikheenko *et al.*, 2018).

187

### 188 **Identification of genes in genome assemblies**

189 To identify the position of gene sequences on the different genome assemblies, we first  
190 extracted a query sequence. We then used the console NCBI+ blast suite (Camacho *et al.*,  
191 2009) to blast the query against the desired target. In the case of the putative MAT-locus, we  
192 used the homeodomain genes HD2 and HD1-like as query (HD2:KT946661.1, HD1-like:



193 KU597387 from isolate A1). For further downstream analyses, we extracted the sequences  
194 from the genome assemblies by using the blastdbcmd command from the NCBI+ suite. We  
195 used a reciprocal blast approach to identify the gene sequences corresponding between the  
196 whole genome sequence data and the single-nucleus data. We considered the bests hits by  
197 evaluating the % identity, mismatches, e-value and bitscore.

198

### 199 **Orthology inference of genes present in drops in coverage regions**

200 We used Orthofinder 2.3.11 (Emms & Kelly, 2019) to identify orthologs of genes that were  
201 found inside the drop in coverage regions within the same isolate. We used the orthogroups  
202 output from Orthofinder for the different analyses.

203

### 204 **Synteny plots**

205 We compared genomic regions by performing synteny plots computed with EasyFig2.2.3  
206 (Sullivan *et al.*, 2011). We provide full Genbank files to compare genomic regions to each  
207 other. The software executes a blast comparison between the regions to determine their  
208 homology.

209

210

### 211 **Genetic distance between nucleotypes**

212 Coding sequences for the 12 confirmed nucleotype-specific genes were extracted using the  
213 Blast+ command line blastdbcmd tool (Camacho *et al.*, 2009). The sequences were then  
214 aligned with MAFFT (Katoch *et al.*, 2017) using the --auto option. Then, the ape package  
215 (Paradis *et al.*, 2004) of R was used to calculate the pairwise distance between the 4 alleles

216 (2 from A5, and 1 each from A1 and C2), and plot a distance tree of the 4 alleles from which  
217 the quartet arrangement was determined. The mean distance was then calculated for the  
218 combined set of the 12 confirmed nucleotide-specific genes.

219

## 220 **Recombination detection**

221 We compared the sequences from drop in coverage regions from both nucleotypes of isolate  
222 A5 and isolates A1 and C2 to detect if isolate A5 display recombination events between the  
223 two putative parental isolates. After identification of the syntenic region among the different  
224 isolates, we aligned the sequences with MAFFT (Kato *et al.*, 2017) and evaluated whether  
225 the sequence of one of the nucleotide of isolate A5 was similar to A1 and the other similar to  
226 C2.

227

## 228 **Phylogenetic analyses**

229 We used MEGA-X (Kumar *et al.*, 2018) for the different phylogenetic reconstructions shown  
230 in the study. We first aligned the data with ClustalW. We then find the best DNA models  
231 describing the relation between the sequences. Finally, we used a maximum likelihood  
232 phylogeny reconstruction with 100 bootstraps to infer the phylogenetic relation among the  
233 samples. In several cases, we were not able to perform maximum likelihood phylogenies  
234 because of the low number of samples to compare, so UPGMA trees were done instead.  
235 Phylogenetic reconstructions of the different orthologous groups on Figure 4 were  
236 produced by the Orthofinder software.

237

238

239 **Results**

240

241 **Drop in coverage analysis reveals potential nucleotide-specific haplotypes**

242 Previously, a drop in coverage analysis was used for the identification of a putative MAT-  
243 locus in *R. irregularis* (Ropars *et al.*, 2016). Although the identification of drops in coverage  
244 at other loci were detected in *R. Irregularis* (Ropars *et al.*, 2016), no further description was  
245 made on those other regions. We developed a ready-to-use algorithm (Supplementary File  
246 1) that allows us to identify genome-wide drop in coverage events (for the accessions of raw  
247 data and genome assemblies used in this study see Supplementary Table 1).

248 We identified drops in coverage in 4 different isolates of *R. irregularis* which are reported to  
249 be dikaryons (A4 and A5) and monokaryons (A1 and C2) (Figure 1a, Supplementary Table  
250 2). However, the number of coverage drops was different between dikaryons (A4-A5) and  
251 monokaryons (A1-C2). Isolates A4 and A5 displayed 1145 and 1032 drops in coverage,  
252 respectively, at different loci while isolates A1 and C2 displayed 129 and 121, respectively  
253 (Figure1b). In the regions where a drop in coverage region was observed, in total we  
254 identified 499, 444,16 and 24 genes in isolates A4, A5, A1 and C2 respectively (Figure 1c,  
255 Supplementary Table 3). These results confirmed that dikaryon isolates displayed more  
256 heterozygous regions than the monokaryons. This suggests that the genes present within  
257 the regions showing a drop in coverage are potential candidates for nucleotide-specific  
258 alleles in dikaryons.

259

260

261 The total length of the regions where a drop in coverage occurred covered 2.37 % of isolate  
262 A4, 2.21 % of isolate A5 and 0.01% of isolate A1 and isolate C2. We identified that 9.1 %

263 and 6.6% of the contigs of isolates A4 and A5 contained regions where a drop in coverage  
264 was observed, while they were very rare (1%) in genome assemblies of isolates A1 and C2  
265 (Figure 1d). These results suggest that the events detected in monokaryon isolates could  
266 represent *de novo* mutations but the most likely explanation is that they could be residual  
267 technical artifacts. The length of the majority of drops in coverage regions was between 1-  
268 2kb and very few spanned more than 10kb (Figure 1d). Confirming the reliability of our  
269 approach, we detected the expected drop in coverage in the MAT-locus region in isolates A4  
270 and A5 but not in isolates A1 and C2 (Figure 1d).

271 One cause for a drop in coverage could be copy number variation between the nucleotides  
272 in a dikaryon. To test for this, we inferred orthologous gene families among the different  
273 isolates to identify if the genes present in the drop in coverage regions displayed more than  
274 one copy in their own genome. We used the gene annotation available for each isolate and  
275 performed the orthology inference on all the genes present in each genome. The  
276 orthologous inference resulted in many orthologous groups displaying more than one copy  
277 within each isolate (A4: 20%, A5: 18%, A1: 17% and C2: 19%; Supplementary figure 1,  
278 Supplementary Table 4) confirming the high incidence of paralogs in these fungi (Morin *et*  
279 *al.*, 2019a). We further identified orthologous gene families of genes detected in drop in  
280 coverage in isolates A4 and A5 independently. Under the assumption of a monokaryon-  
281 dikaryon genome organization in *R. irregularis*, to avoid the confounding effect of  
282 duplications and reduce the complexity of the dataset, we kept only the orthologous groups  
283 that are present in the drop in coverage regions and that display two copies in the dikaryon  
284 isolates (A4, A5) and a single copy in the monokaryons (A1, C2) (Figure 2a, Supplementary  
285 Table 5). We identified 32 orthologous groups that are present with two copies in isolate A4  
286 and only a single copy in isolates A1 and C2. We also identified 27 orthologous groups in  
287 isolate A5 that display two copies. Only two orthologous groups were common between the  
288 two isolates: namely, HD2 and HD1-like which are part of the putative MAT-locus in *R.*  
289 *irregularis* (Figure 2b).

290

291 As reported in Ropars *et al.*, we observed that the two copies of the putative MAT-locus in  
292 the dikaryons were located in different contigs. One copy of HD2 and HD1-like genes were  
293 present in a long contig of the genome assembly, while the second copy was present in a  
294 much shorter contig (Figure 2c). We observed the same pattern for the other orthologous  
295 groups, where the second copy was always present in a second shorter contig (for several  
296 examples see Figure 2d). We then tested if the orthologous genes from the different isolates  
297 are orthologs and not paralogs. We performed a synteny analysis to compare the genomic  
298 location among isolates of the orthologous genes. We identified that 12 out of 32 predicted  
299 orthologs in A4 and 16 out of 27 predicted orthologs in A5, were located in the same  
300 genomic location on the different isolates, suggesting that they could be considered as  
301 orthologs (Supplementary Table 5, for examples of inferred orthologs and paralogs see  
302 Supplementary Figure 2).

303 Taken together, this shows that in the whole genome assemblies of dikaryon isolates, two  
304 divergent alleles were assembled into different scaffolds; one longer scaffold containing  
305 neighboring regions and a shorter scaffold without the neighboring regions. Given the  
306 haploid nuclei of the dikaryon isolates, two possibilities are consistent with this previous fact:  
307 The two copies could be present within the same nucleus or in different nuclei.

308

### 309 **Drop in coverage signatures represent nucleotide-specific haplotypes**

310 To confirm that genes found inside drop in coverage regions are nucleotide-specific, we  
311 used raw reads generated from whole genome sequencing of individual nuclei of dikaryon  
312 isolates A4 and A5 (Chen *et al.*, 2018a) to produce *de novo* single-nucleus assemblies. The  
313 *de novo* assemblies were very fragmented and incomplete (Supplementary table 6) and their  
314 utilization was highly limited. This limitation resulted in the inability to identify some genes

315 and some complete gene sequences. However, a reciprocal blast approach between the  
316 whole genome assembly and the single-nucleus assemblies allowed us to detect sequences  
317 in the single-nucleus assemblies corresponding to the genes detected in the whole genome  
318 assemblies.

319 We tested in the dikaryons if the genes identified in the drop in coverage regions were  
320 present in the form of different alleles in different single nuclei by using a reciprocal blast  
321 approach (Supplementary Table 7). We confirmed 9 orthologous genes to be nucleotide-  
322 specific in isolate A4 and 12 orthologous genes in isolate A5 (Table 1). We found that the  
323 population of nuclei clustered in two groups that corresponded to the identity of the MAT-  
324 locus contained in each nucleus (Figure 3). This result confirms that nucleotide-specific  
325 alleles in dikaryon isolates can be identified based on genes found in drop in coverage  
326 regions and that are represented by a duplication within the genome assembly.

327

328 **Nucleotide-specific alleles from A5 share a more recent evolutionary origin with**  
329 **monokaryon isolates A1 and C2 than among them**

330 The origin of dikaryon isolates could be investigated through comparisons of monokaryon  
331 isolates that display the same putative MAT-locus as those found in the dikaryons (Isolates  
332 A5:MAT-3/MAT-6; A1:MAT-3; C2: MAT-6). A phylogenetic reconstruction of the putative  
333 MAT-locus suggests that MAT-3 from isolates A1 and A5 are more closely related than  
334 MAT-6 from isolates C2 and A5 (Ropars *et al.*, 2016). Furthermore, genome-wide reduced  
335 genome representation phylogenetic reconstructions of several *R. irregularis* isolates  
336 indicated that isolate A5 is more closely related to isolate A1 than to isolate C2 (Wyss *et al.*,  
337 2016; Savary *et al.*, 2018)

338 To confirm the previous findings, for each previously defined nucleotide-specific gene, we  
339 compared the phylogenetic relationship of the two nucleotide-specific alleles in isolate A5

340 isolate and in isolates A1, C2 and A4. We observed that for several nucleotide-specific  
341 genes, genes from isolate A1 clustered with one of the alleles of isolate A5, but it was not  
342 always the case in isolate C2 (Figure 4a).

343

344 We then analyzed the genetic distance of each of the 12 nucleotide-specific genes  
345 independently between the two alleles of isolate A5 and the homologous allele in isolates A1  
346 and C2. The mean nucleotide distance between the two A5 alleles was 0.147. The mean  
347 distance between A1 and C2 was 0.132. In contrast, the mean of the minimum distance  
348 between an allele of isolate A5 and isolate A1 was 0.013 and between A5 and C2 was  
349 0.043. If we randomly select one allele for each gene, into a set "a", the mean distance for  
350 the 12 nucleotide-specific alleles for one allele from A5 (allele "a") to A1 was 0.031, and  
351 0.122 for the second allele (allele "b"). The distance of the same allele "a" from isolate A5 to  
352 C2 was 0.136, and the distance of the second allele "b" to C2 was 0.062 (Figure 4b). We did  
353 not observe any case where the two A5 alleles clustered together, instead we observed that  
354 for all 12 nucleotide-specific gene the two A5 alleles were more similar to the allele from  
355 isolate A1 or C2 (Figure 4c). The mean distances calculated between alleles in this study are  
356 much higher than average distances calculated on the whole genome between different  
357 isolates (Chen *et al.*, 2018b), reflecting our selection criteria for nucleotide-specific regions.  
358 As each of the A5 alleles was closer to A1 or C2, instead of the two A5 alleles being most  
359 similar, this indicates that the alleles of A5 share a more recent evolutionary origin with these  
360 monokaryons than the two alleles within A5.

361

### 362 **Recombination between nucleotide-specific haplotypes in isolate A5**

363 Knowledge about nucleotide-specific haplotypes of dikaryon isolate A5 and their orthologs  
364 in isolates A1 and C2 allowed us to test whether recombination occurred in nucleotide-

365 specific haplotypes of dikaryon isolate A5 (Figure 5a). We scanned the different nucleotype-  
366 specific-haplotypes for the detection of recombination events within the two haplotypes of  
367 isolate A5. Comparison of haplotypes from isolates A1, C2 and the two haplotypes of A5  
368 showed that each nucleotype-specific sequence from isolate A5 was highly similar to either  
369 isolate A1 or C2, but we did not identify any recombination events within haplotypes (Figure  
370 5b).

371 To further assess the potential for clonal relationships between the two nucleotypes within  
372 A5 and isolates A1 and C2, we compared the nucleotype-specific haplotypes on the single-  
373 nucleus assemblies from isolate A5 and their orthologs on the single-nucleus assemblies of  
374 isolates A1 and C2 (Supplementary Table 8). The difference with the previous analysis is  
375 that with the single-nucleus data, we are able to identify the putative MAT-type of the A5  
376 haplotypes. We found that for several nucleotype-specific genes (i.e. OG 2995, OG3981 and  
377 OG4715), the nuclei from isolates A5 (MAT-3 type) and A1 (MAT-3 type) clustered together  
378 (Figure 5c). However, we found that for other nucleotype-specific genes (OG4925, OG4492  
379 and OG4493), the nuclei from isolate A5 (MAT-3 type) clustered with nuclei from isolate C2  
380 which has a MAT-6 type (Figure 5d). The alignments on these nucleotype-specific genes  
381 show that A5 nuclei with MAT-3 have similar, but not identical alleles as C2 nuclei (MAT-6  
382 type). In the same way, A5 nuclei with MAT-6 type harbor alleles similar to those of A1 nuclei  
383 (MAT-3 type). These results demonstrate that the A5 isolate harbors nucleotypes with  
384 regions highly similar to isolates A1 and C2, but that the A1-like alleles are not always found  
385 in the same nucleus. The presence of recombinant nucleotypes in isolate A5, involving  
386 isolates sharing the same MAT-type, strongly suggest that isolate A5 results from a  
387 recombination event between isolates similar to A1 and C2.

388



389 **Discussion**

390 We identified regions that display drops in coverage in genome assemblies. Within these  
391 regions, we identified genes that only displayed a second ortholog in dikaryon isolates and  
392 not in monokaryon isolates. We then confirmed with an independent dataset, consisting of a  
393 population of individual nuclei, that in dikaryon isolates, genes observed in the regions that  
394 displayed a drop in coverage are nucleotide-specific. With the information of nucleotide-  
395 specific haplotypes, we found that nucleotypes of isolate A5 were as little 1% diverged from  
396 isolate A1 and 4% diverged from isolate C2, suggesting that isolates sharing the same MAT-  
397 type as the monokaryon isolates A1 and C2 are closely related ancestors (specially for A1)  
398 from which the dikaryon A5 arose. Finally, we identified recombination between nucleotide-  
399 specific haplotypes of isolate A5 suggesting that a sexual process involving meiotic-like large  
400 scale recombination at some stage is likely at the origin of this isolate.

401 Our approach allowed us to identify divergent nucleotide-specific idiomorphs in dikaryon  
402 isolates situated in different contigs of the short-read whole genome assemblies. This  
403 approach differs from previous approaches of global intra-isolate divergence assessment  
404 that measured the number of SNPs (Chen *et al.*, 2020) or poly-allelic sites (Wyss *et al.*,  
405 2016). Although the comparison of both types of measurements gave similar information  
406 (intra-isolate divergence), their comparison should be carefully addressed as their  
407 methodology and the types of sequences compared are different. While SNPs are best  
408 identified in low divergence regions, where reads can be confidently mapped to the same  
409 contig, these idiomorphic sequences are highly divergent to the point that they are  
410 assembled in different contigs in the same genome assembly. Consequently, genetic  
411 divergence should be higher in idiomorphs than when the two alleles are collapsed in the  
412 genome assembly, resulting in sequences displaying several SNPs.

413

414 The approach used in this study allowed us to identify nucleotide specific idiomorphs,  
415 including the already known HD2 and HD1-like contained in the putative MAT-locus (Ropars  
416 *et al.*, 2016). The majority of the nucleotide-specific genes are annotated as hypothetical  
417 proteins, with the exception of two galactose oxidases (OG4529, OG4667), a S-adenosyl-L-  
418 methionine-dependent methyltransferase (OG1886) and a prephenate dehydrogenase  
419 (OG4386). Interestingly, the MAT-locus genes are the only genes identified as assembled  
420 into two nucleotide-specific alleles in this study that are common to the two dikaryons. A  
421 likely reason why we recovered very few nucleotide-specific genes reflects the choice of  
422 filters (syntenic as well as confirmed with single-nucleus data) and the reduction of the  
423 complexity of the dataset by keeping only genes with a single copy in the monokaryon  
424 isolates A1 and C2. In addition, our methodology did not allow us to identify  
425 presence/absence nucleotide-specific haplotypes where a gene is present in one  
426 nucleotide and absent in the other nucleotide. Consequently, the count of nucleotide-  
427 specific genes represents a lower estimate and we would expect a significantly higher  
428 number of actual nucleotide-specific genes between the nuclei in a dikaryon.

429 In AMF, signatures of inter-nucleus recombination in dikaryon isolates have been claimed  
430 (Chen *et al.*, 2018a, 2020). Although not specified, the reported large recombination blocks  
431 would be consistent with meiotic-type recombination. However, the experimental design on  
432 which these results were based did not include any prior crossing of parental isolates or  
433 comparison to sequences from putative originating isolates. In the absence of a recent  
434 parental mixing, these results could also be the result of processes like mitotic recombination  
435 or gene conversion. Furthermore, increased scrutiny revealed technical artifacts suggesting  
436 that the method used had limited utility to evaluate inter-nuclear recombination (Auxier &  
437 Bazzicalupo, 2019). In this study, we tested for the detection of recombination signatures  
438 between homologous regions that could have originated from isolates sharing the same  
439 MAT-type. We identified recombinant nucleotypes between different regions of single-  
440 nucleus genome assemblies not apparent from the genome assemblies of the dikaryon. The

441 reason for this is that a dikaryon genome assembly lacks phasing information for the  
442 haplotypes, contrary to the single-nucleus data where phasing information is immediately  
443 apparent (each nucleus has an assigned MAT-type). Integrating the phasing of the  
444 haplotypes with the information of the MAT-type, we were able to identify recombination  
445 patterns in the single-nucleus data. We did not identify recombination breakpoints, because  
446 of the short length of the haplotype sequences. In addition, we did not identify recombination  
447 within genes, which is not surprising, as the haplotypes we identified are relatively small, as  
448 well as that recombination within genes could disrupt the gene architecture and function.

449 We observed that the A5 MAT-3 nuclei contained three genes more similar to a MAT-6  
450 monokaryon, while the A5 MAT-6 nuclei contained three genes more similar to a MAT-3  
451 monokaryon. Consequently, the recombination pattern observed is consistent with sexual  
452 reproduction because the sequence changes are reciprocal between the two putative  
453 parental isolates, although we limited our comparison to only two monokaryon genome  
454 assemblies. In contrast, in parasexual recombination, we would expect non-symmetrical  
455 recombination patterns leading to loss of heterogeneity between the two different  
456 nucleotypes (Forche *et al.*, 2008). This result, coupled with the experimental evidence of  
457 molecular activation of genes related to mating in AMF (Mateus *et al.*, 2020), further  
458 suggests sexual reproduction in AMF.

459 Our results indicated that if we have different nucleotide-specific haplotypes which are  
460 polymorphic in isolate A5 (ie: A/a, B/b) and if there is no recombination, these should be  
461 separated into two nucleotypes: MAT-3 (AB) and MAT-6 (ab). However, in contrast, we  
462 observed that the dikaryon A5 MAT-3 nucleotype contains a recombinant genotype (Ab), and  
463 that the A5 MAT-6 nucleotype has a recombinant genotype (aB). If we compare the A5 MAT-  
464 3 (Ab) and A5 MAT-6 (aB) nucleotypes to A1 MAT-3 (AB) and C2 MAT-6 (ab), the results  
465 suggest that A1 and C2-like isolates could be MAT-3 and MAT-6 progenitors of isolate A5,  
466 separated by at least one recombinant sexual event. The increased genetic distance (~4%)  
467 for C2-like alleles from A5 make it less likely that the actual C2 isolate represent the

468 progenitor of A5. However, we cannot discount that future sequencing of additional isolates  
469 will identify other isolates that could be more closely related to the A5 nucleotypes.

470 Maintaining monokaryon and dikaryon isolates within the same natural population suggests  
471 that both forms are stable over time. Rather than a promiscuous mixing between isolates via  
472 anastomosis, a mechanism of recognition that involves the MAT-locus seems to regulate  
473 which isolates can form a dikaryon (Corradi & Brachmann, 2017). The fact that nucleotype-  
474 specific haplotypes from isolate A5 are more closely related to isolates A1 and C2, and that  
475 A5 nucleotypes display recombination, suggests that an isolate similar to A1 and an isolate  
476 sharing the same MAT-type as C2 could be the origin of a recombining dikaryon isolate.  
477 However, we cannot discard that these findings could apply to another step of the AMF life  
478 cycle. It could also be possible that a stable A5 isolate could segregate producing  
479 recombined monokaryons highly similar to A1 and that share the same MAT-type as C2, that  
480 can disperse and then fuse again to form stable dikaryons and complete a life cycle which  
481 involves recombination. It then becomes crucial to experimentally confirm if monokaryon  
482 isolates having different MAT-types could generate a dikaryon-like form and if a dikaryon  
483 isolate could segregate into recombining monokaryon isolates.

484 Understanding the life cycle of AMF could have an enormous impact in the generation of  
485 AMF genetic variability. The generation of diverse AMF monokaryons or dikaryons could be  
486 used to generate variants that enhance plant growth and have an enormous potential in  
487 agriculture (Sanders, 2010).

488

489

#### 490 **Acknowledgments**

491 We would like to thank Daniel Croll for his feedback on a preliminary version of this  
492 manuscript. We also thank three anonymous reviewers that provide constructive feedback

493 on the manuscript. This study was funded by the Swiss National Science Foundation (Grant  
494 number: 31003A\_162549 to IRS).

495

#### 496 **Author contributions**

497 IDM designed and supervised all the analyses. MMSN developed the drop in coverage  
498 detection algorithm. JC identified the genes present in the regions displaying drop in  
499 coverage. BA developed the genetic relatedness analysis on the nucleotide-specific  
500 haplotypes. SL provided valuable comments during all the process. IDM, performed all the  
501 bioinformatic analyses, identified the nucleotide-specific genes, performed the phylogenetic  
502 analysis, gene-retrieval from genome assemblies and the recombination detection. IDM and  
503 IRS wrote the manuscript. All the authors provided valuable contributions and modifications  
504 of the manuscript.

505

#### 506 **Data availability**

507 All data analyzed in this manuscript its available in the NCBI repository and the respective  
508 accession identifiers could be found in Supplementary table 1. The custom code developed  
509 for the identification of drop in coverage regions could be found in Supplementary file 1.

510

511

512

#### 513 **References**

514

- 515 **Angelard C, Colard A, Niculita-Hirzel H, Croll D, Sanders IR. 2010.** Segregation in a  
516 mycorrhizal fungus alters rice growth and symbiosis-specific gene transcription. *Current*  
517 *Biology* **20**: 1216–21.
- 518 **Antunes PM, Koch AM, Morton JB, Rillig MC, Klironomos JN. 2011.** Evidence for  
519 functional divergence in arbuscular mycorrhizal fungi from contrasting climatic origins. *The*  
520 *New phytologist* **189**: 507–14.
- 521 **Augé RM. 2001.** Water relations, drought and vesicular-arbuscular mycorrhizal symbiosis.  
522 *Mycorrhiza* **11**: 3–42.
- 523 **Auxier B, Bazzicalupo A. 2019.** Comment on ‘Single nucleus sequencing reveals evidence  
524 of inter-nucleus recombination in arbuscular mycorrhizal fungi’. *eLife* **8**: 1–9.
- 525 **Bankevich A, Nurk S, Antipov D, Gurevich AA, Dvorkin M, Kulikov AS, Lesin VM,**  
526 **Nikolenko SI, Pham S, Pribelski AD, et al. 2012.** SPAdes: A new genome assembly  
527 algorithm and its applications to single-cell sequencing. *Journal of Computational Biology* **19**:  
528 455–477.
- 529 **Bever JD, Morton J. 1999.** Heritable variation and mechanism of inheritance of spore shape  
530 within a population of *Scutellosporea pellucida*, An arbuscular mycorrhizal fungus. *American journal of*  
531 *botany* **86**: 1209–1216.
- 532 **Camacho C, Coulouris G, Avagyan V, Ma N, Papadopoulos J, Bealer K, Madden TL.**  
533 **2009.** BLAST+: Architecture and applications. *BMC Bioinformatics* **10**: 1–9.
- 534 **Chen ECH, Mathieu S, Hoffrichter A, Ropars J, Dreissig S, Fuchs J, Brachmann A,**  
535 **Corradi N. 2020.** More Filtering on SNP Calling Does Not Remove Evidence of Inter-  
536 Nucleus Recombination in Dikaryotic Arbuscular Mycorrhizal Fungi. *Frontiers in Plant*  
537 *Science* **11**: 1–9.
- 538 **Chen EC, Mathieu S, Hoffrichter A, Sedziewska-Toro K, Peart M, Pelin A, Ndikumana**

- 539 **S, Ropars J, Dreissig S, Fuchs J, et al. 2018a.** Single nucleus sequencing reveals  
540 evidence of inter-nucleus recombination in arbuscular mycorrhizal fungi. *eLife* **7**: 1–17.
- 541 **Chen ECH, Morin E, Beaudet D, Noel J, Yildirim G, Ndikumana S, Charron P, St-Onge C,**  
542 **Giorgi J, Krüger M, et al. 2018b.** High intraspecific genome diversity in the model  
543 arbuscular mycorrhizal symbiont *Rhizophagus irregularis*. *New Phytologist* **220**: 1161–1171.
- 544 **Corradi N, Brachmann A. 2017.** Fungal Mating in the Most Widespread Plant Symbionts?  
545 *Trends in Plant Science* **22**: 175–183.
- 546 **Croll D, Sanders IR. 2009.** Recombination in *Glomus intraradices*, a supposed ancient  
547 asexual arbuscular mycorrhizal fungus. *BMC Evolutionary Biology* **9**: 13.
- 548 **Emms DM, Kelly S. 2019.** OrthoFinder: Phylogenetic orthology inference for comparative  
549 genomics. *Genome Biology* **20**: 1–14.
- 550 **Forche A, Alby K, Schaefer D, Johnson AD, Berman J, Bennett RJ. 2008.** The  
551 Parasexual Cycle in *Candida albicans* Provides an Alternative Pathway to Meiosis for the  
552 Formation of Recombinant Strains (J Heitman, Ed.). *PLoS Biology* **6**: e110.
- 553 **Giovannetti M, Azzolini D, Citernesi AS. 1999.** Anastomosis Formation and Nuclear and  
554 Protoplasmic Exchange in Arbuscular Mycorrhizal Fungi. *Applied and environmental*  
555 *microbiology* **65**: 5571–5575.
- 556 **Halary S, Malik S-B, Lildhar L, Slamovits CH, Hijri M, Corradi N. 2011.** Conserved  
557 meiotic machinery in *Glomus* spp., a putatively ancient asexual fungal lineage. *Genome*  
558 *biology and evolution* **3**: 950–8.
- 559 **Harrison MJ. 1997.** The arbuscular mycorrhizal symbiosis: An underground association.  
560 *Trends in Plant Science* **2**: 54–60.
- 561 **van der Heijden M, Klironomos J, Ursic M, Moutoglis P, Streitwolf-Engel R, Boller T,**

- 562 **Wiemken A, Sanders IR. 1998.** Mycorrhizal fungal diversity determines plant biodiversity,  
563 ecosystem variability and productivity. *Nature* **74**: 69–72.
- 564 **Judson OP, Normark BB. 1996.** Ancient asexual scandals. *Trends in Ecology and*  
565 *Evolution* **11**: 41–46.
- 566 **Katoh K, Rozewicki J, Yamada KD. 2017.** MAFFT online service: multiple sequence  
567 alignment, interactive sequence choice and visualization. *Briefings in Bioinformatics*: 1–7.
- 568 **Kobayashi Y, Maeda T, Yamaguchi K, Kameoka H, Tanaka S, Ezawa T, Shigenobu S,**  
569 **Kawaguchi M. 2018.** The genome of *Rhizophagus clarus* HR1 reveals a common genetic  
570 basis for auxotrophy among arbuscular mycorrhizal fungi. *BMC Genomics* **19**: 1–11.
- 571 **Kokkoris V, Chagnon P, Yildirim G, Clarke K, Goh D, MacLean AM, Dettman J, Stefani**  
572 **F, Corradi N. 2021.** Host identity influences nuclear dynamics in arbuscular mycorrhizal  
573 fungi. *Current Biology*: 1–8.
- 574 **Krueger F. 2015.** Trim galore. A wrapper tool around *Cutadapt* and *FastQC* to consistently  
575 apply quality and adapter trimming to *FastQ* files **516**: 517.
- 576 **Kumar S, Stecher G, Li M, Knyaz C, Tamura K. 2018.** MEGA X: Molecular evolutionary  
577 genetics analysis across computing platforms. *Molecular Biology and Evolution* **35**: 1547–  
578 1549.
- 579 **Lauri A, Lazzari G, Galli C, Lagutina I, Genzini E, Braga F, Mariani P, Williams JL. 2013.**  
580 Assessment of MDA efficiency for genotyping using cloned embryo biopsies. *Genomics* **101**:  
581 24–9.
- 582 **Leinonen R, Sugawara H, Shumway M. 2011.** The sequence read archive. *Nucleic Acids*  
583 *Research* **39**: 2010–2012.
- 584 **Li H. 2013.** Aligning sequence reads, clone sequences and assembly contigs with BWA-



585 MEM. 00: 1–3.

586 **Li F, Upadhyaya NM, Sperschneider J, Matny O, Nguyen-Phuc H, Mago R, Raley C,**  
587 **Miller ME, Silverstein KAT, Henningsen E, et al. 2019.** Emergence of the Ug99 lineage of  
588 the wheat stem rust pathogen through somatic hybridisation. *Nature communications* **10**:  
589 5068.

590 **Marleau J, Dalpé Y, St-Arnaud M, Hijri M. 2011.** Spore development and nuclear  
591 inheritance in arbuscular mycorrhizal fungi. *BMC evolutionary biology* **11**: 51.

592 **Masclaux FG, Wyss T, Mateus-Gonzalez ID, Aletti C, Sanders IR. 2018.** Variation in allele  
593 frequencies at the bg112 locus reveals unequal inheritance of nuclei in a dikaryotic isolate of  
594 the fungus *Rhizophagus irregularis*. *Mycorrhiza* **28**: 369–377.

595 **Masclaux FG, Wyss T, Pagni M, Rosikiewicz P, Sanders IR. 2019.** Investigating  
596 unexplained genetic variation and its expression in the arbuscular mycorrhizal fungus  
597 *Rhizophagus irregularis*: A comparison of whole genome and RAD sequencing data. *PLoS*  
598 *ONE* **14**: 1–20.

599 **Mateus ID, Rojas EC, Savary R, Dupuis C, Masclaux FG, Aletti C, Sanders IR. 2020.**  
600 Coexistence of genetically different *Rhizophagus irregularis* isolates induces genes involved  
601 in a putative fungal mating response. *The ISME Journal*.

602 **Mikheenko A, Prjibelski A, Saveliev V, Antipov D, Gurevich A. 2018.** Versatile genome  
603 assembly evaluation with QUAST-LG. *Bioinformatics* **34**: i142–i150.

604 **Morin E, Miyauchi S, Clemente S, Chen ECH, Pelin A, Providencia I De, Ndikumana S,**  
605 **Beaudet D, Hainaut M, Drula E, et al. 2019a.** Comparative genomics of *Rhizophagus*  
606 *irregularis*, *R. cerebriforme*, *R. diaphanus* and *Gigaspora rosea* highlights specific genetic  
607 features in Glomeromycotina. : 1584–1598.

608 **Morin E, Miyauchi S, San Clemente H, Chen ECH, Pelin A, Providencia I, Ndikumana S,**

- 609 **Beaudet D, Hainaut M, Drula E, et al. 2019b.** Comparative genomics of *Rhizophagus*  
610 *irregularis*, *R. cerebriforme*, *R. diaphanus* and *Gigaspora rosea* highlights specific genetic  
611 features in Glomeromycotina. *New Phytologist* **222**: 1584–1598.
- 612 **Ning L, Liu G, Li G, Hou Y, Tong Y, He J. 2014.** Current challenges in the bioinformatics of  
613 single cell genomics. *Frontiers in Oncology* **4 JAN**: 1–7.
- 614 **Paradis E, Claude J, Strimmer K. 2004.** APE: Analyses of phylogenetics and evolution in R  
615 language. *Bioinformatics* **20**: 289–290.
- 616 **Quinlan AR, Hall IM. 2010.** BEDTools: A flexible suite of utilities for comparing genomic  
617 features. *Bioinformatics* **26**: 841–842.
- 618 **Remy W, Taylor TN, Hass H, Kerp H. 1994.** Four hundred-million-year-old vesicular  
619 arbuscular mycorrhizae. *Proceedings of the National Academy of Sciences of the United*  
620 *States of America* **91**: 11841–11843.
- 621 **Ropars J, Toro KS, Noel J, Pelin A, Charron P, Farinelli L, Marton T, Krüger M, Fuchs**  
622 **J, Brachmann A, et al. 2016.** Evidence for the sexual origin of heterokaryosis in arbuscular  
623 mycorrhizal fungi. *Nature Microbiology*: 16033.
- 624 **Sanders IR. 2010.** Designer mycorrhizas: Using natural genetic variation in AM fungi to  
625 increase plant growth. *ISME Journal* **4**: 1081–1083.
- 626 **Savary R, Masclaux FG, Wyss T, Droh G, Cruz Corella J, Machado AP, Morton JB,**  
627 **Sanders IR. 2018.** A population genomics approach shows widespread geographical  
628 distribution of cryptic genomic forms of the symbiotic fungus *Rhizophagus irregularis*. *ISME*  
629 *Journal* **12**: 17–30.
- 630 **Smith SE, Read DJ. 2008.** *Mycorrhizal Symbiosis*. London: Elsevier Ltd.
- 631 **Spatafora JW, Chang Y, Benny GL, Lazarus K, Smith ME, Berbee ML, Bonito G,**

- 632 **Corradi N, Grigoriev I, Gryganskyi A, et al. 2016.** A phylum-level phylogenetic  
633 classification of zygomycete fungi based on genome-scale data. *Mycologia* **108**: 1028–1046.
- 634 **Sullivan MJ, Petty NK, Beatson SA. 2011.** Easyfig: A genome comparison visualizer.  
635 *Bioinformatics* **27**: 1009–1010.
- 636 **Thygesen K, Larsen J, Bødker L. 2004.** Arbuscular mycorrhizal fungi reduce development  
637 of pea root-rot caused by *Aphanomyces euteiches* using oospores as pathogen inoculum.  
638 *European Journal of Plant Pathology* **110**: 411–419.
- 639 **Todd RT, Forche A, Selmecki A. 2017.** Ploidy Variation in Fungi: Polyploidy, Aneuploidy,  
640 and Genome Evolution. In: *The Fungal Kingdom*. American Society of Microbiology, 599–  
641 618.
- 642 **Wyss T, Masclaux FG, Rosikiewicz P, Pagni M, Sanders IR. 2016.** Population genomics  
643 reveals that within-fungus polymorphism is common and maintained in populations of the  
644 mycorrhizal fungus *Rhizophagus irregularis*. *ISME Journal* **10**: 2514–2526.
- 645 **Yildirim G, Malar C M, Kokkoris V, Corradi N. 2020.** Parasexual and Sexual Reproduction  
646 in Arbuscular Mycorrhizal Fungi: Room for Both. *Trends in Microbiology* **xx**: 1–3.
- 647 **Yilmaz S, Singh AK. 2012.** Single cell genome sequencing. *Current opinion in*  
648 *biotechnology* **23**: 437–43.
- 649 **Yoon S, Xuan Z, Makarov V, Ye K, Sebat J. 2009.** Sensitive and accurate detection of  
650 copy number variants using read depth of coverage. *Genome Research* **19**: 1586–1592.
- 651
- 652
- 653

654

655 **Figure legends**

656

657 **Figure 1. Drop in coverage events in isolates A4, A5, A1 and C2.** **a**, Examples of drop in  
658 coverage events. We plotted the normalized coverage (y) per position (x). Grey rectangles  
659 represent the region detected by the algorithm. The horizontal dashed line represents the  
660 normalized coverage. **b**, Number of regions showing a drop in coverage that were detected  
661 in each isolate. **c**, Number of genes found in the regions showing a drop in coverage in each  
662 isolate. **d**, Summary statistics of regions showing a drop in coverage: i, proportion of total  
663 length of regions showing a drop in coverage and proportion of contigs that contain regions  
664 with a drop in coverage. ii, Histogram representing the lengths of identified regions where a  
665 drop in coverage was detected. iii, Coverage plot on the MAT-locus. Drop in coverage was  
666 detected in isolates A4 and A5 but not in A1 and C2.

667

668

669 **Figure 2. Identification of orthologs of genes present in regions showing a drop in**  
670 **coverage.** **a**, Orthologous groups that display two or more genes in dikaryons and only a  
671 single gene in monokaryons. This analysis was performed independently on isolate A4 and  
672 isolate A5. \* orthologous genes containing HD2 and HD1-like genes respectively. **b**, Venn  
673 diagram representing the number of shared orthologous groups within drop in coverage  
674 regions between isolates A4 and A5. Only two orthologous groups were shared between the  
675 isolates, they contain the MAT-locus genes HD2 and HD1-like. **c**, Synteny plot between the  
676 two contigs containing the different alleles of the MAT-locus of isolates A4 and A5. **d**,  
677 Synteny plot between the two contigs containing different alleles of other orthologous genes.  
678 Please note that the synteny figures are made from the public available annotations of each

679 genome assembly. Differences in size of open-reading frames (ORF) among isolates are  
680 due to differences in detection of ORF on each isolate and likely could be the result of the  
681 annotation process.

682

683 **Figure 3. Single-nucleus sequence data confirms that genes contained in regions**  
684 **where a drop in coverage was observed are nucleotide-specific.** Phylogenetic  
685 reconstruction of single-nucleus for genes found in regions where a drop in coverage was  
686 detected in A4 and A5 isolates. The genes are named by their membership to the  
687 orthologous groups previously defined. Branch support consisting of 100 bootstraps is  
688 shown. When only sequences from three nuclei were included, we performed an UPGMA  
689 hierarchical clustering. **a**, data for nuclei from A4 isolate. **b**, data for nuclei from A5 isolate.

690

691 **Figure 4. Nucleotypes from isolate A5 share a more recent evolutionary origin to**  
692 **isolates A1 and C2 than among them.** **a**, Phylogenetic reconstruction of nucleotype-  
693 specific alleles in isolate A5 and its orthologs in isolates A1, C2 and A4. **c**, Average genetic  
694 distances between the different nucleotide-specific alleles from two alleles from isolates A5  
695 and their homologs in isolates A1 and C2. We show histograms representing the genetic  
696 distance between the two nucleotide-specific alleles of isolate A5 and their homologues in  
697 isolates A1 and C2. For comparisons between A5 and C1 or A1 we used the minimum  
698 distance of the two alleles from A5. **d**, Scenarios of genetic similarity between the two A5  
699 alleles and alleles from A1 and C2.

700

701 **Figure 5. Recombination events in nucleotide-specific haplotypes in A5 isolate.** **a**,  
702 Schematic representation of possible outcomes after fusion of two different isolates. Please  
703 note the schema illustrates different contigs, separated by blank lines and no different

704 chromosomes. **b**, Multiple sequence alignment of sequences identified in nucleotide-specific  
705 haplotypes from whole genome sequence data. We show only a part of the alignment  
706 representative of all the aligned sequences. We observe that in all the nucleotide-specific  
707 haplotypes, the A5 nucleotypes display only similarity to one of the potential parental  
708 isolates. No evidence of recombination is detected within the alignments. **c**, Phylogenetic  
709 relationship and multiple sequence alignment on different nucleotide-specific alleles  
710 between different nuclei from A1, A5 and C2 isolates. Cases where no recombination was  
711 detected. Nuclei having the same MAT-type clustered together. **d**, Phylogenetic relationship  
712 and multiple sequence alignment on different nucleotide-specific alleles between different  
713 nuclei from A1, A5 and C2 isolates. Cases where recombination was detected. Nuclei having  
714 the same MAT-type did not clustered together. We performed 100 bootstraps for the branch  
715 support.

716

## 717 **Table legends**

718

719 **Table 1. Summary of genes contained in regions displaying a drop in coverage that**  
720 **were validated as nucleotide-specific.** We show the number of genes that were found in  
721 drop in coverage regions that displayed two copies in the dikaryons and a single copy in the  
722 monokaryons. We then filtered out the genes that were present in the same contig. After that  
723 we only kept the genes that were present in syntenic regions among the different isolates.  
724 Finally, we only kept the genes that displayed at least two types in the single-nucleus  
725 genome assemblies. The final number of genes defined as nucleotide-specific was  
726 validated during the previous sequential steps.

727

728

729

730

731

732

733

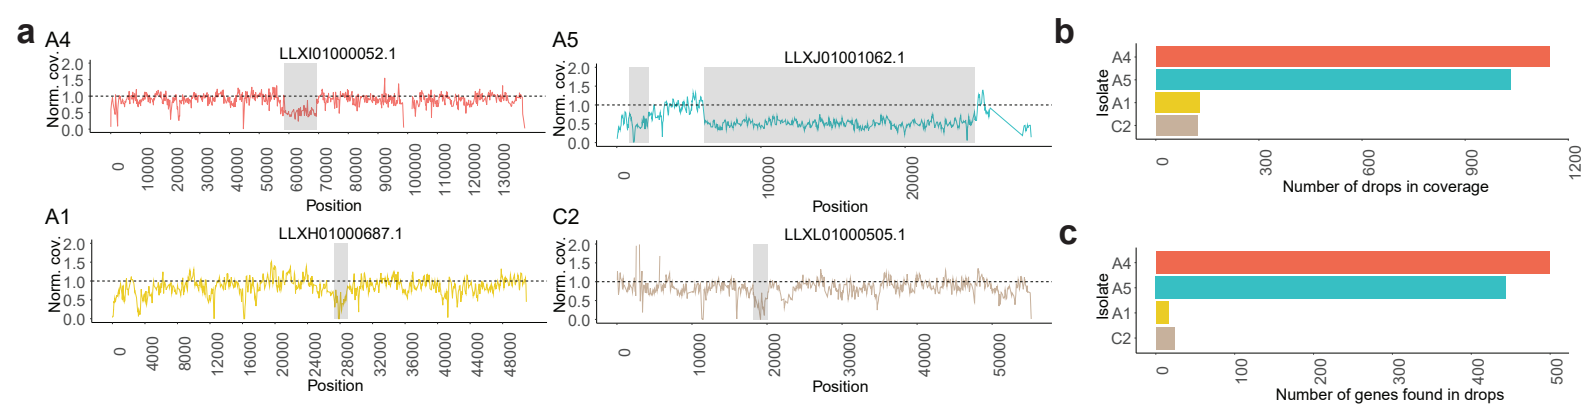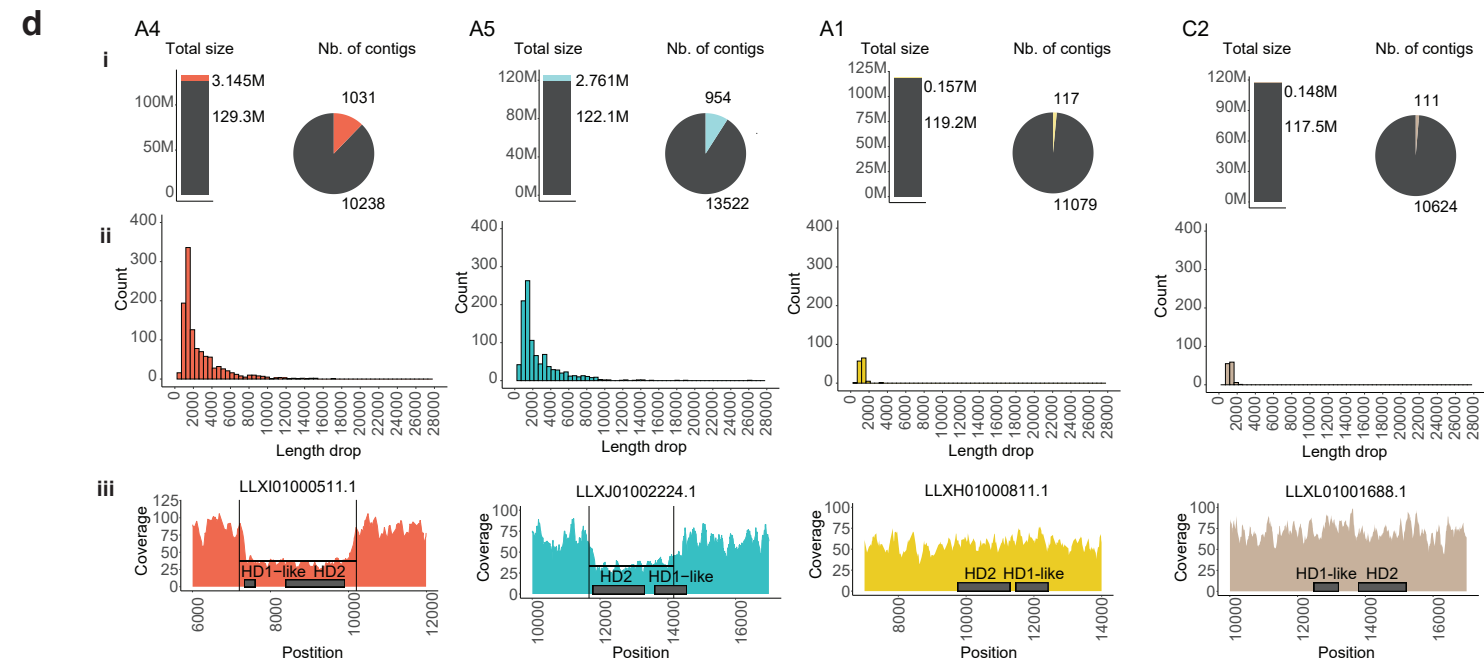



**a**

**Orthologs A4**

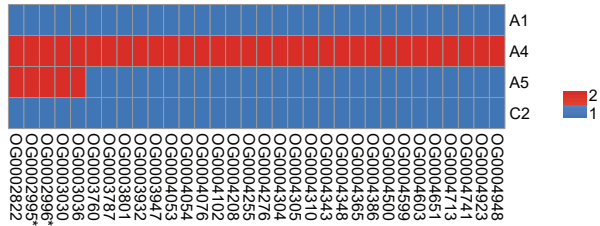

**Orthologs A5**

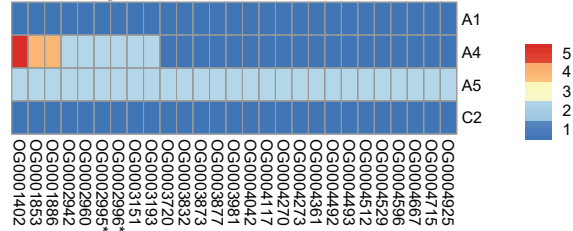

**b**

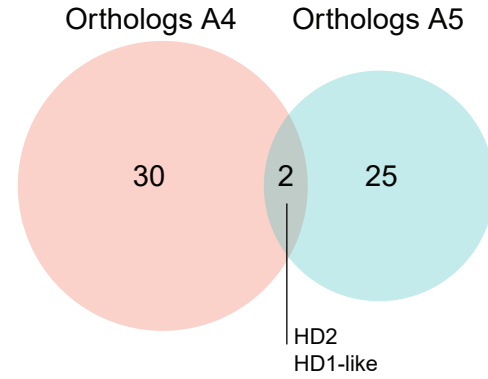

**c**

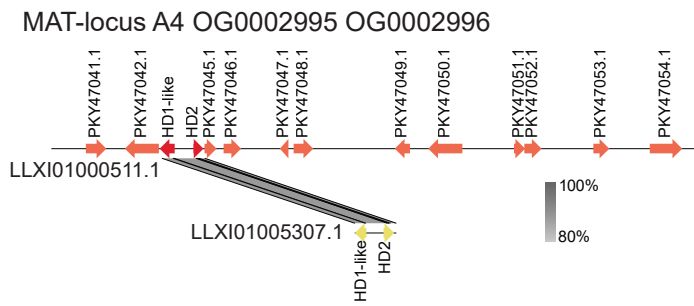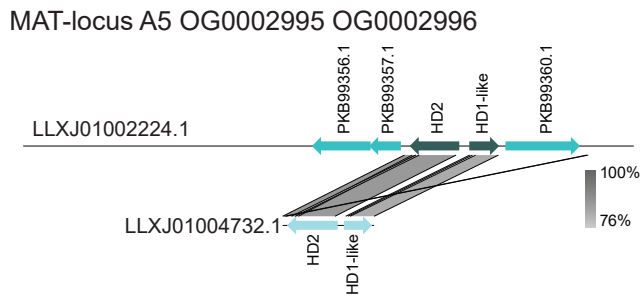

**d**

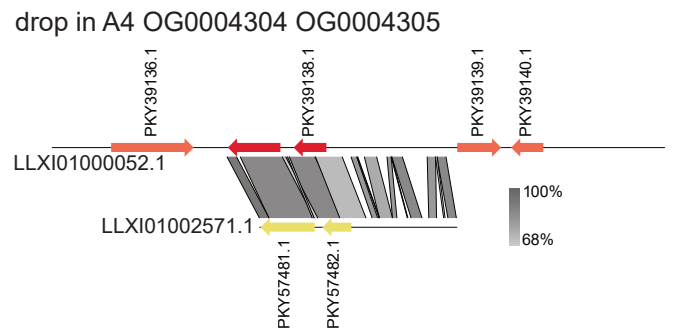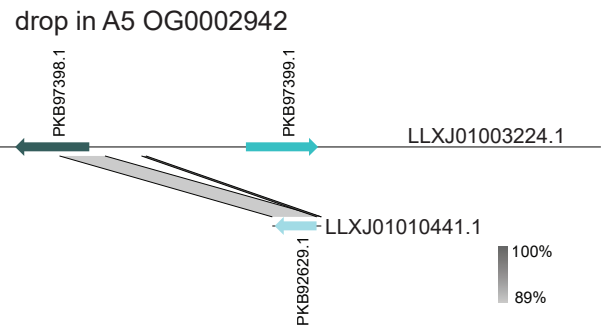

**a**

### Single nuclei confirmation A4

■ MAT-1 ■ MAT-2 ■ undetermined

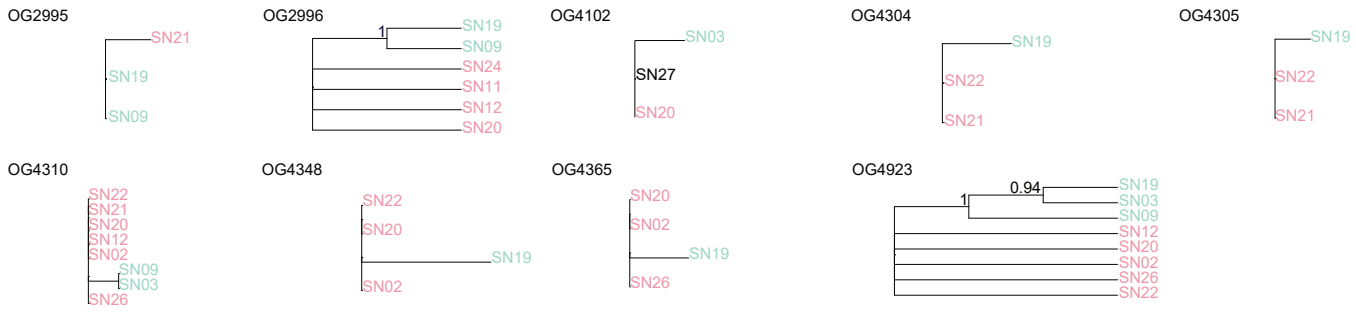

**b**

### Single nuclei confirmation A5

■ MAT-3 ■ MAT-6 ■ undetermined

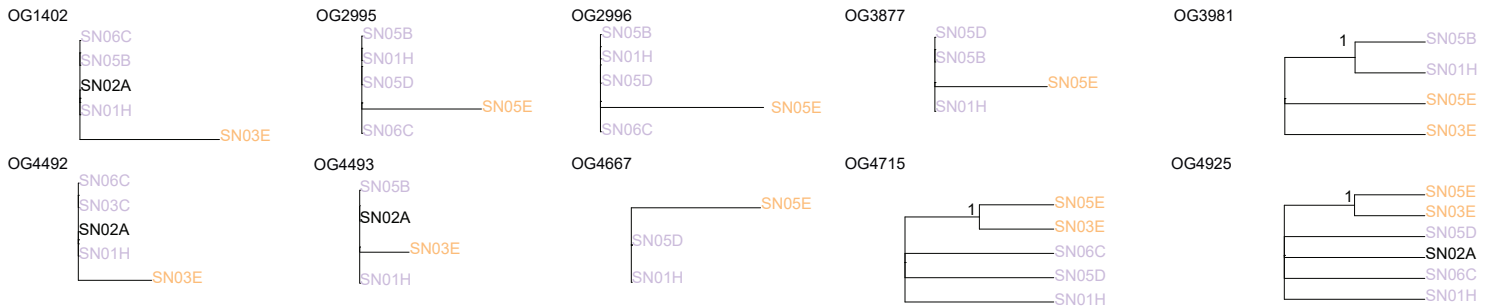

**a**

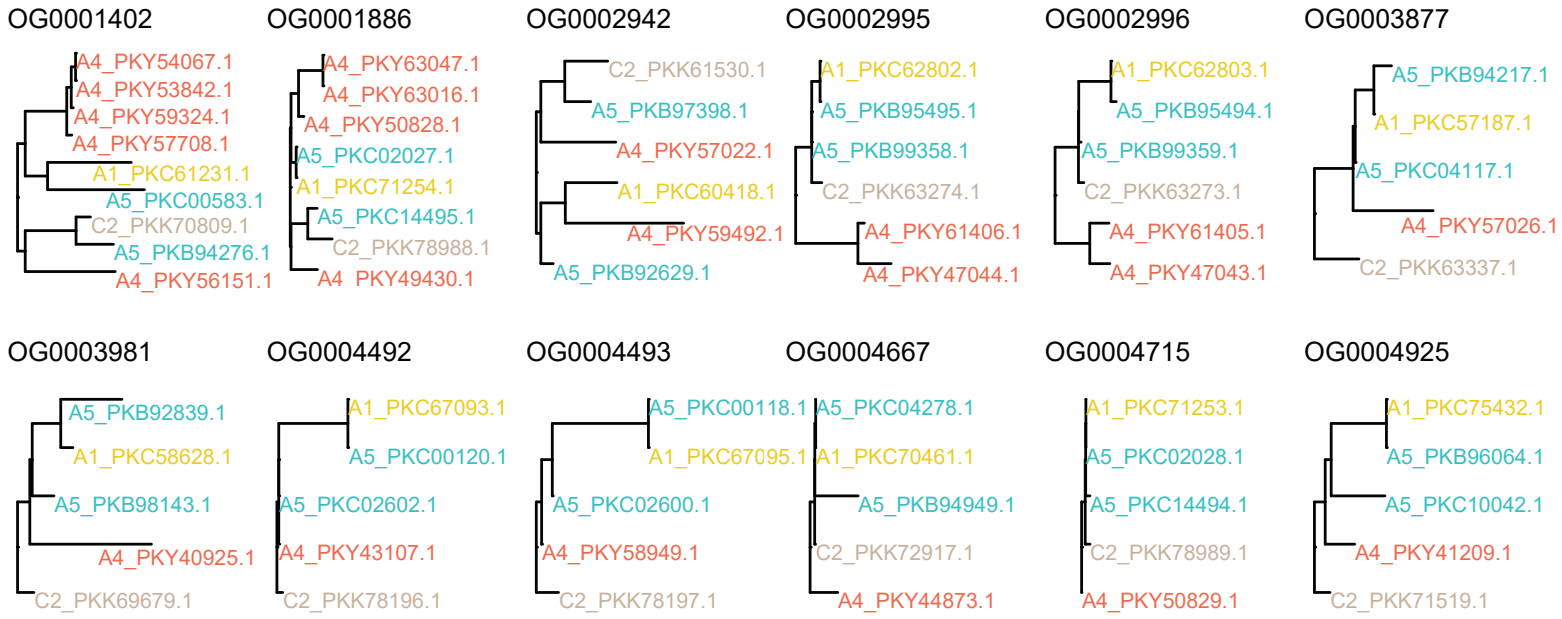

**b**

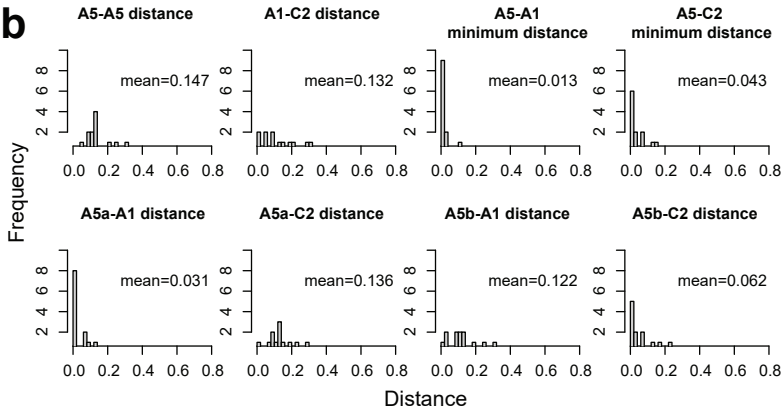

**c**

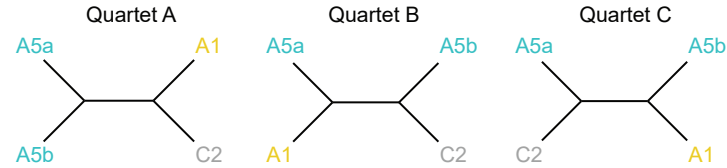

| Scenario                          | Quartet | Count |
|-----------------------------------|---------|-------|
| A5 alleles more closely related   | A       | 0     |
| A5 alleles more distantly related | B or C  | 12    |

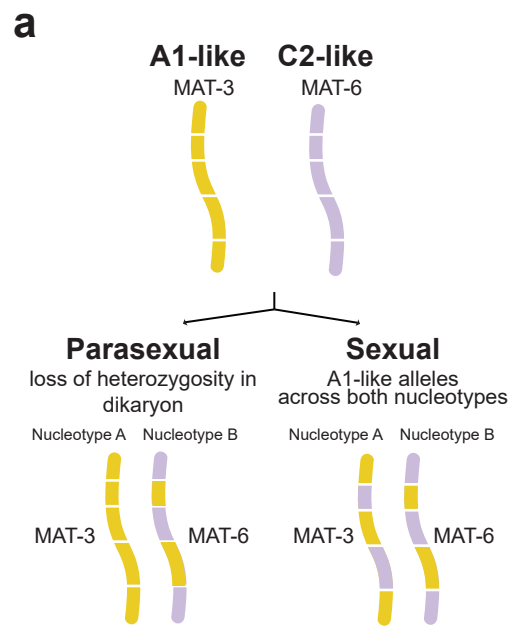

**b** Whole-genome assemblies comparison

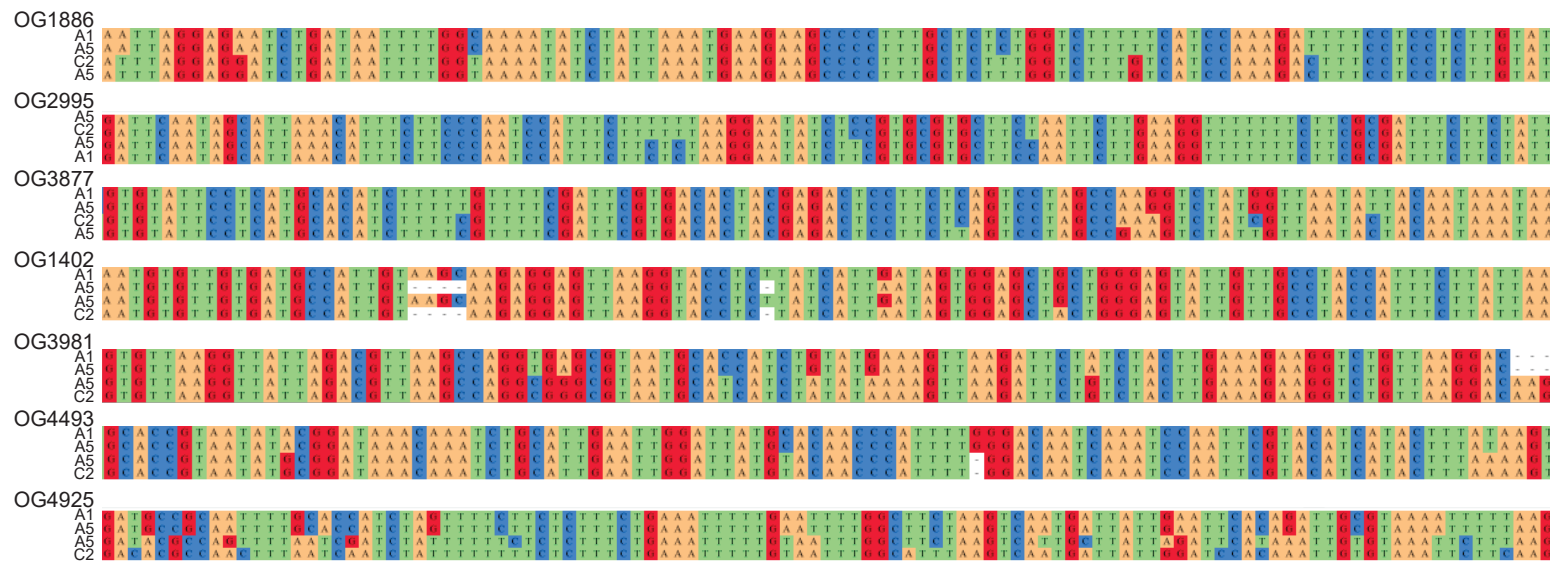

**c** Single-nuclei comparison  
no recombination between locus and mating type

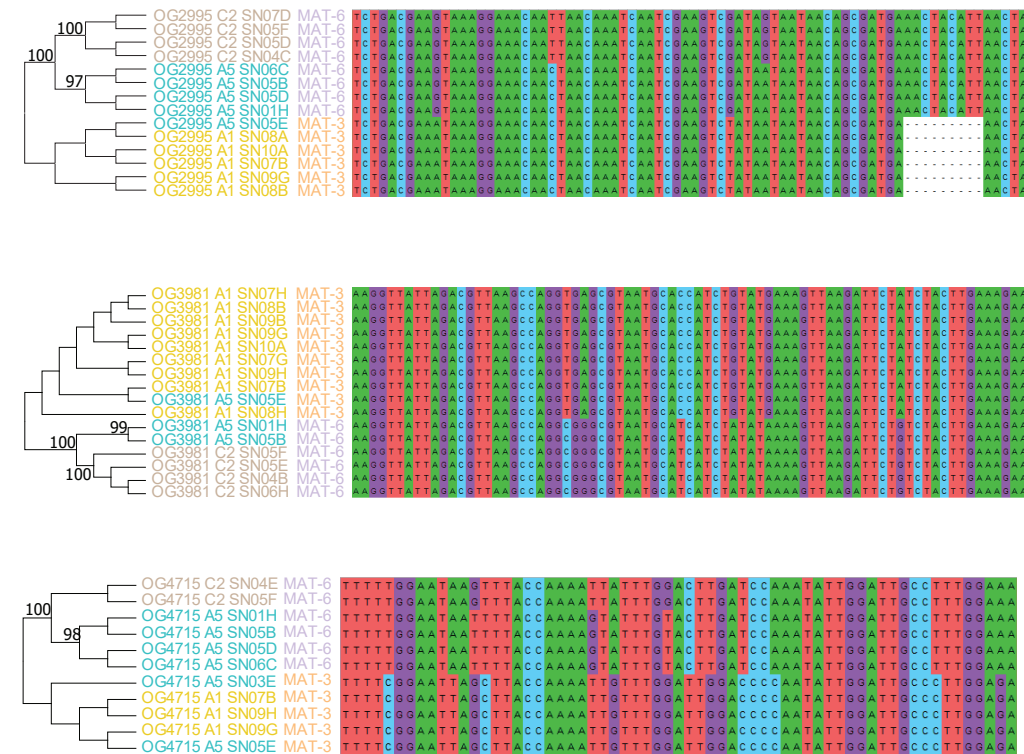

**d** Single-nuclei comparison  
recombination between locus and mating type

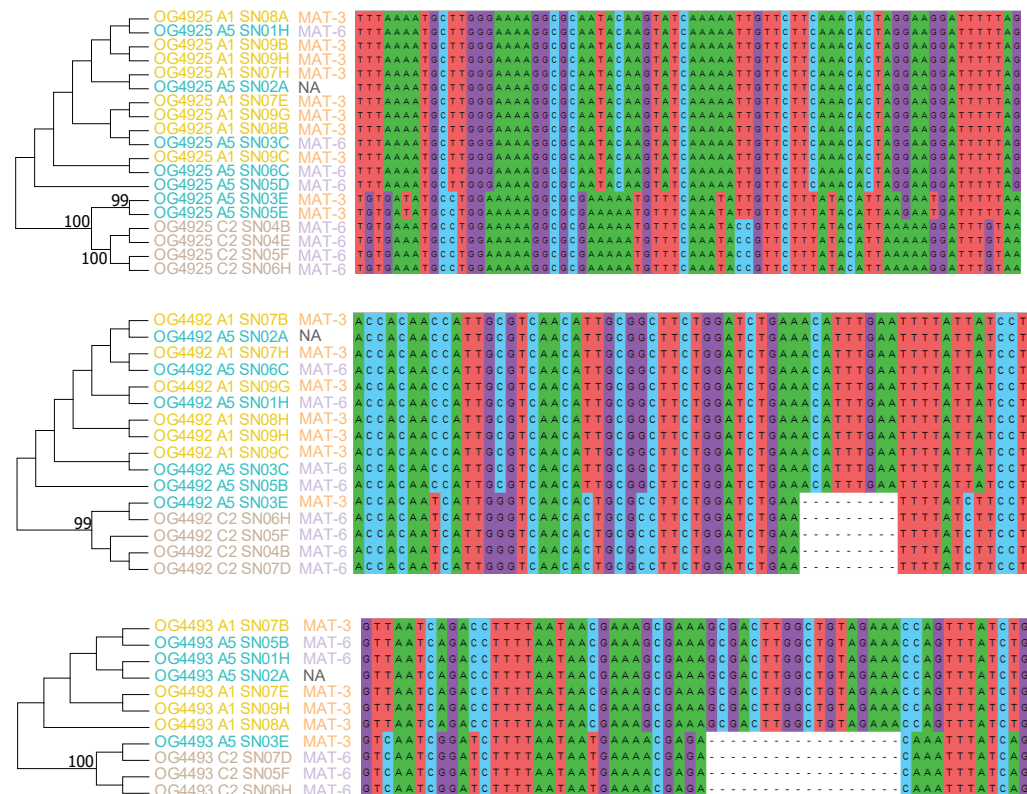

Source: https://biorxiv.org/content/10.1101/2021.03.05.434083v1.full.pdf
